# Supplementary material
Source: PubMed Central journal article supplement (PMC3634697)
Supplement: supp_tpc.112.108951_tpc108951-Supplemental_Data.pdf [file supp_tpc.112.108951_tpc108951-Supplemental_Data.pdf]

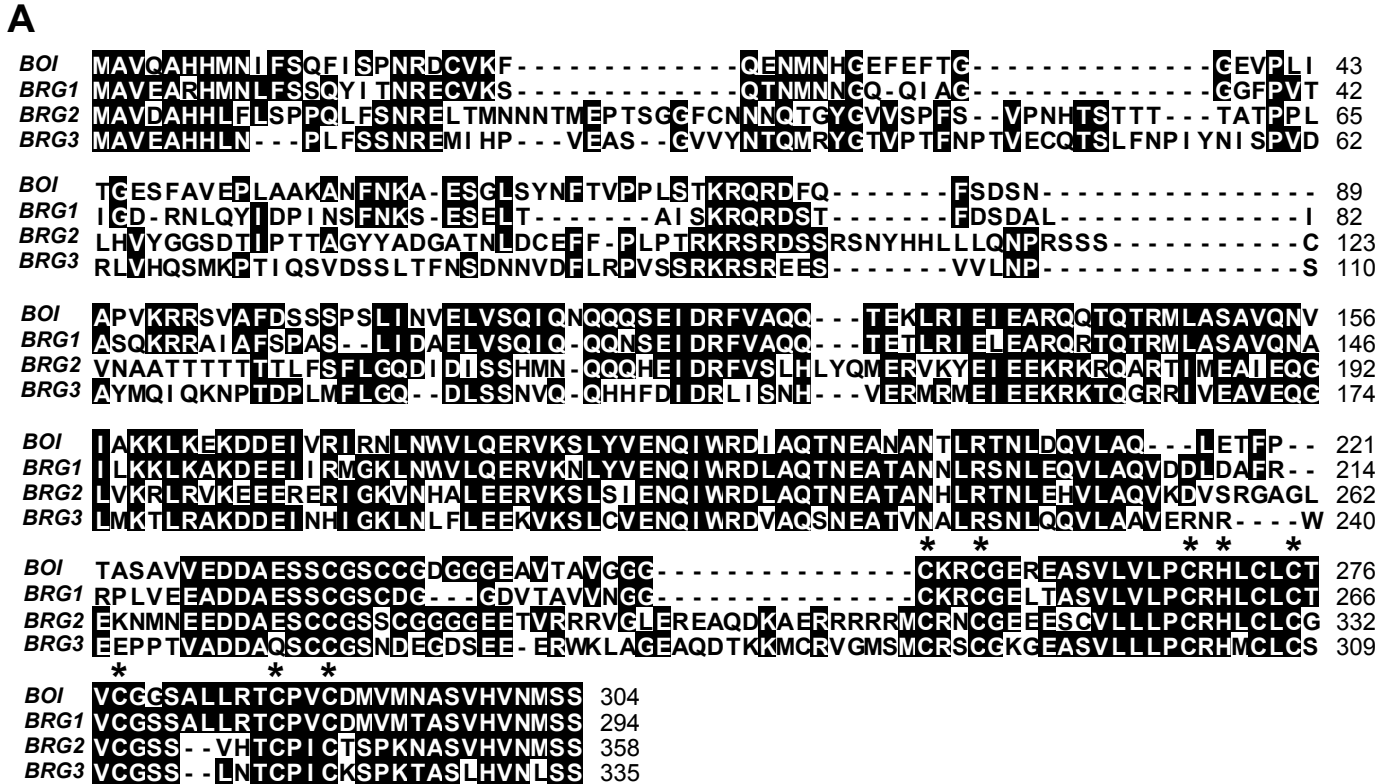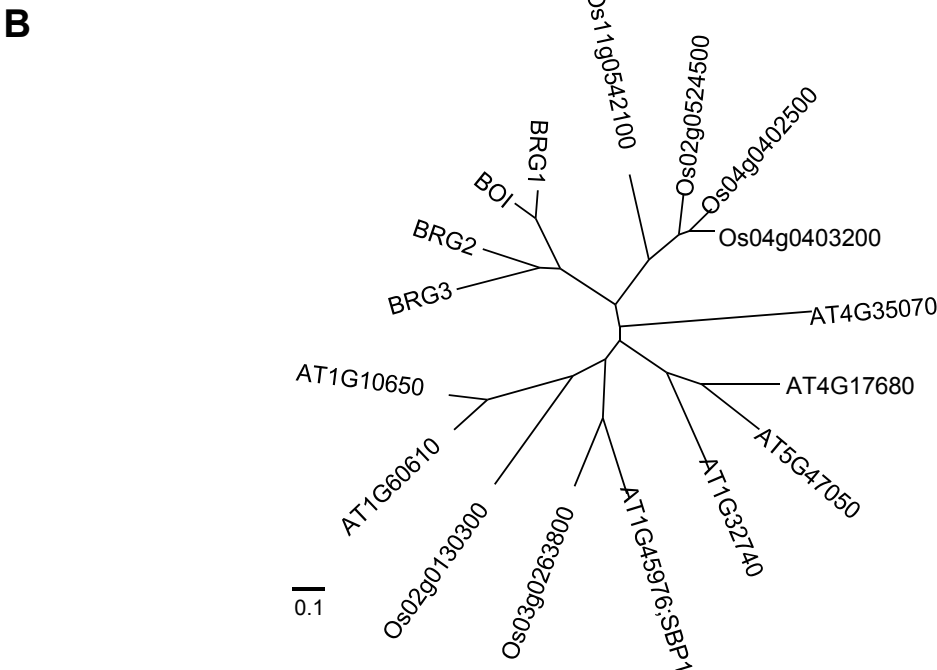

**Supplemental Figure 1.** Amino acid alignment of the four BOIs (A) and a neighbor-joining tree showing the relationships among the BOIs and their *Arabidopsis* and rice homologs (B). Sequence alignment was generated by Clustal W multiple alignment tool of BioEdit ([www.mbio.ncsu.edu/bioedit/bioedit.html](http://www.mbio.ncsu.edu/bioedit/bioedit.html)) and the phylogenetic tree was generated by MEGA5 program ([www.megasoftware.net](http://www.megasoftware.net)). The evolutionary distances were computed using the Poisson correction method. The scale bar indicates the evolutionary distance of 0.1 amino acid substitution per position.; \* indicates zinc-coordinating Cys or His residues.

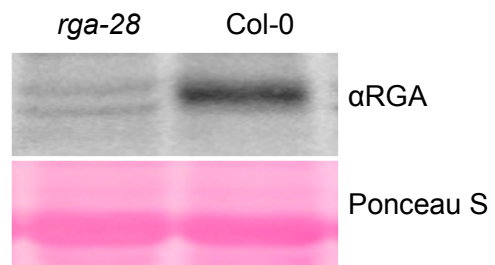

**Supplemental Figure 2.** The specificity of RGA antibody. 7-day-old white light-grown seedlings of the *rga-28* and Col-0 were used for the analysis of RGA antibody.

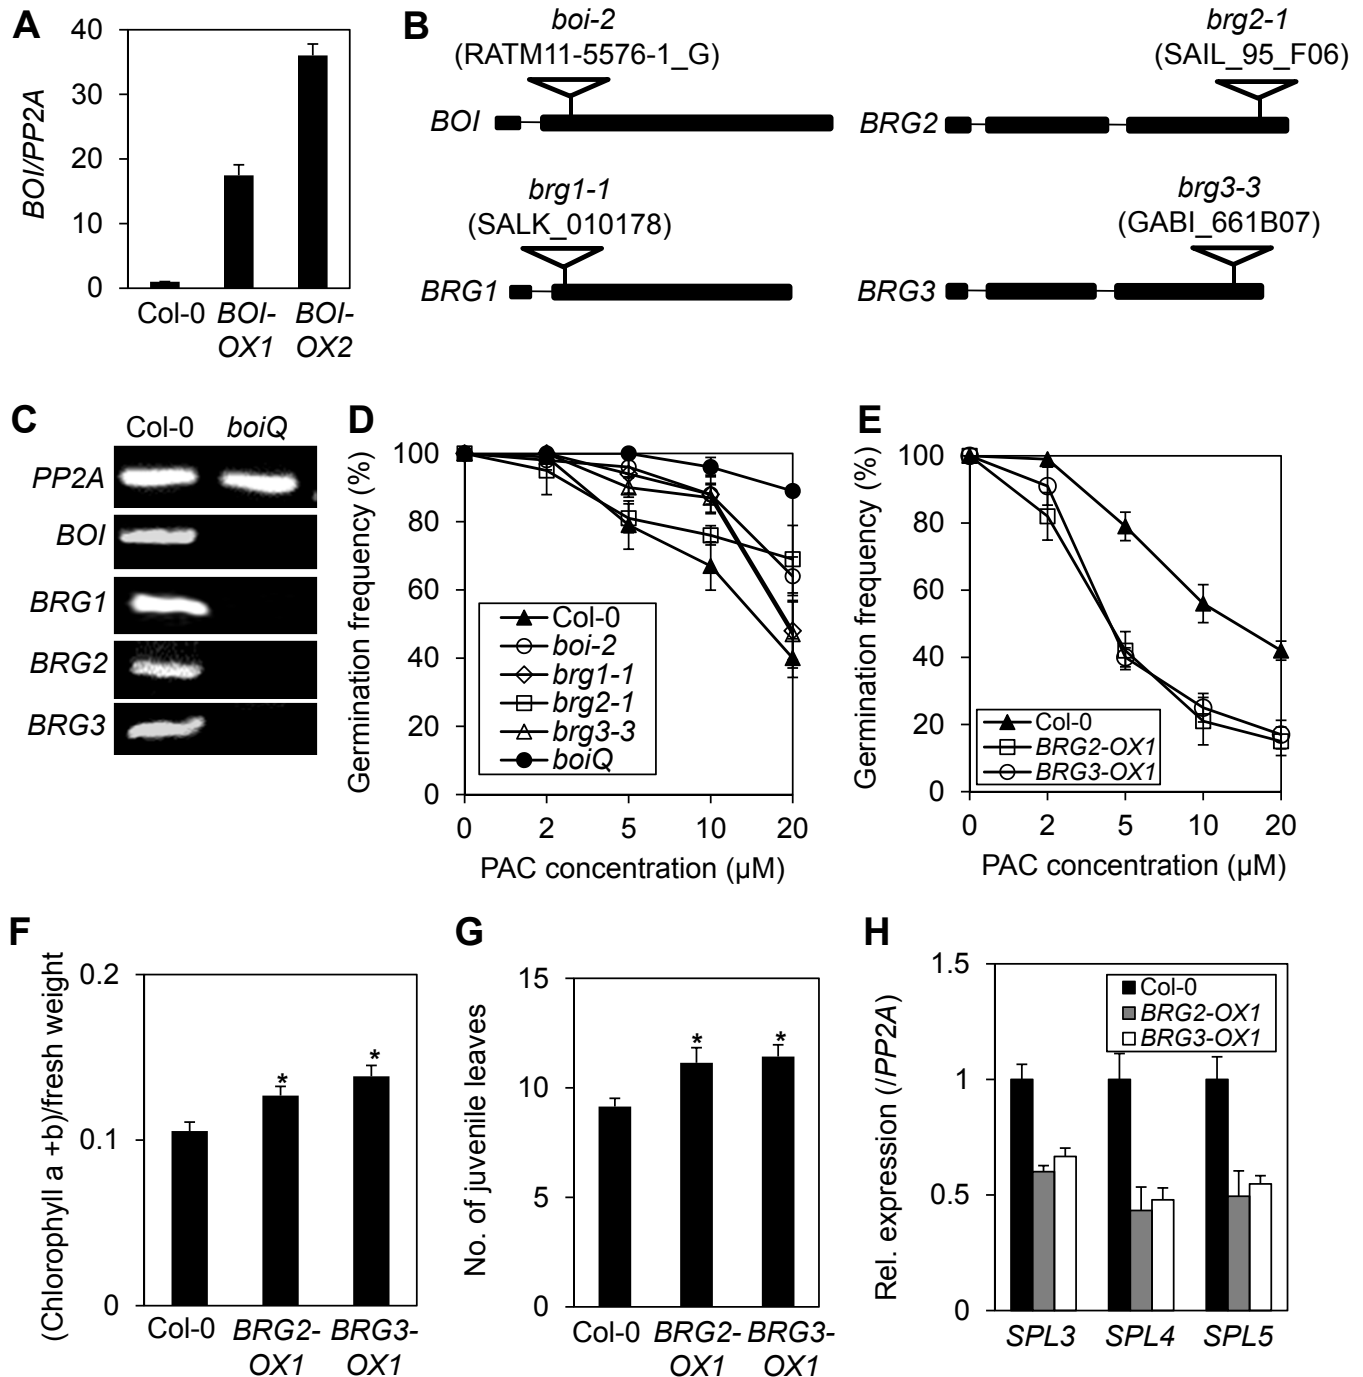

**Supplemental Figure 3.** BOI family members redundantly inhibit GA responses. (A) *BOI* mRNA expression levels in the two *BOI*-overexpressing lines. *BOI* mRNA levels (endogenous + transgenic) were determined in 7-day-old seedlings grown under LD (SD, n=3). (B) T-DNA insertion mutants of *BOI* family members. Exons are indicated by filled rectangles and T-DNAs are by inverted triangles. (C) The full-length *BOI* mRNAs are not detected in the *boi* quadruple mutant (*boiQ*) seedlings, as determined by RT-PCR. (D) Germination frequencies of single and quadruple mutants of *BOI* family members in the presence of PAC (SD, n=3). (E) Decreased germination frequencies of *BRG2*- and *BRG3*-overexpressing lines in the presence of PAC (SD, n=3). (F) Increased chlorophyll accumulation by *BRG2*- and *BRG3*-overexpressing lines (SD, n=6; \*, p<0.05, Student's t-test). (G) Delayed juvenile-to-adult phase transition in *BRG2*- and *BRG3*-overexpressing lines (SD, n=10; \*, p<0.05, Student's t-test). (H) Decreased expression of *SPL* mRNAs in *BRG2*- and *BRG3*-overexpressing lines. 17-day-old plants were sampled for expression analysis at the 12<sup>th</sup> hour of light (SD, n=3 biological replicates).

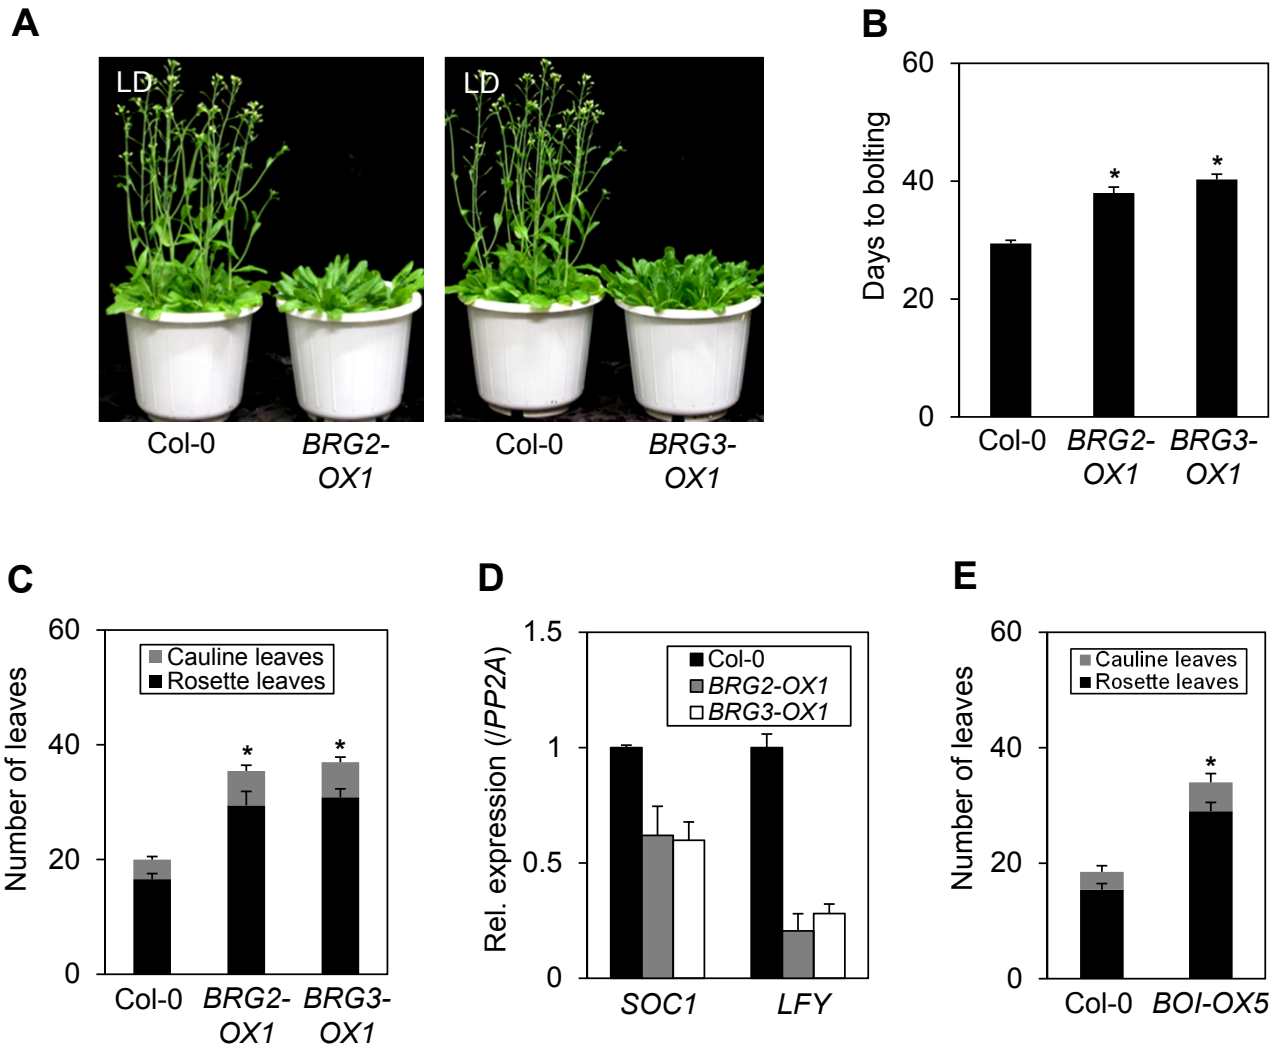

**Supplemental Figure 4.** Overexpression of *BRGs* inhibit flowering and mRNA expression of *SOC1* and *LFY*. (A) Delayed flowering in *BRG2*- and *BRG3*-overexpressing plants under the LD condition. Pictures were taken at 5 weeks. (B) Quantification of bolting days in *BRG2*- and *BRG3*-overexpressing plants under the LD condition (SD, n=10; \*, p<0.05, Student's t-test). (C) Quantification of rosette leaves and cauline leaves in *BRG2*- and *BRG3*-overexpressing plants under the LD condition (SD, n=10; \*, p<0.05, Student's t-test). (D) Decreased expression of *SOC1* and *LFY* mRNAs in *BRG2*- and *BRG3*-overexpressing lines under the LD condition. 17-day-old plants were sampled for expression analysis at the 12<sup>th</sup> hour of light (SD, n=3 biological replicates). (E) Quantification of rosette leaves and cauline leaves in *BOI-OX5* plants under the LD condition (SD, n=10; \*, p<0.05, Student's t-test).

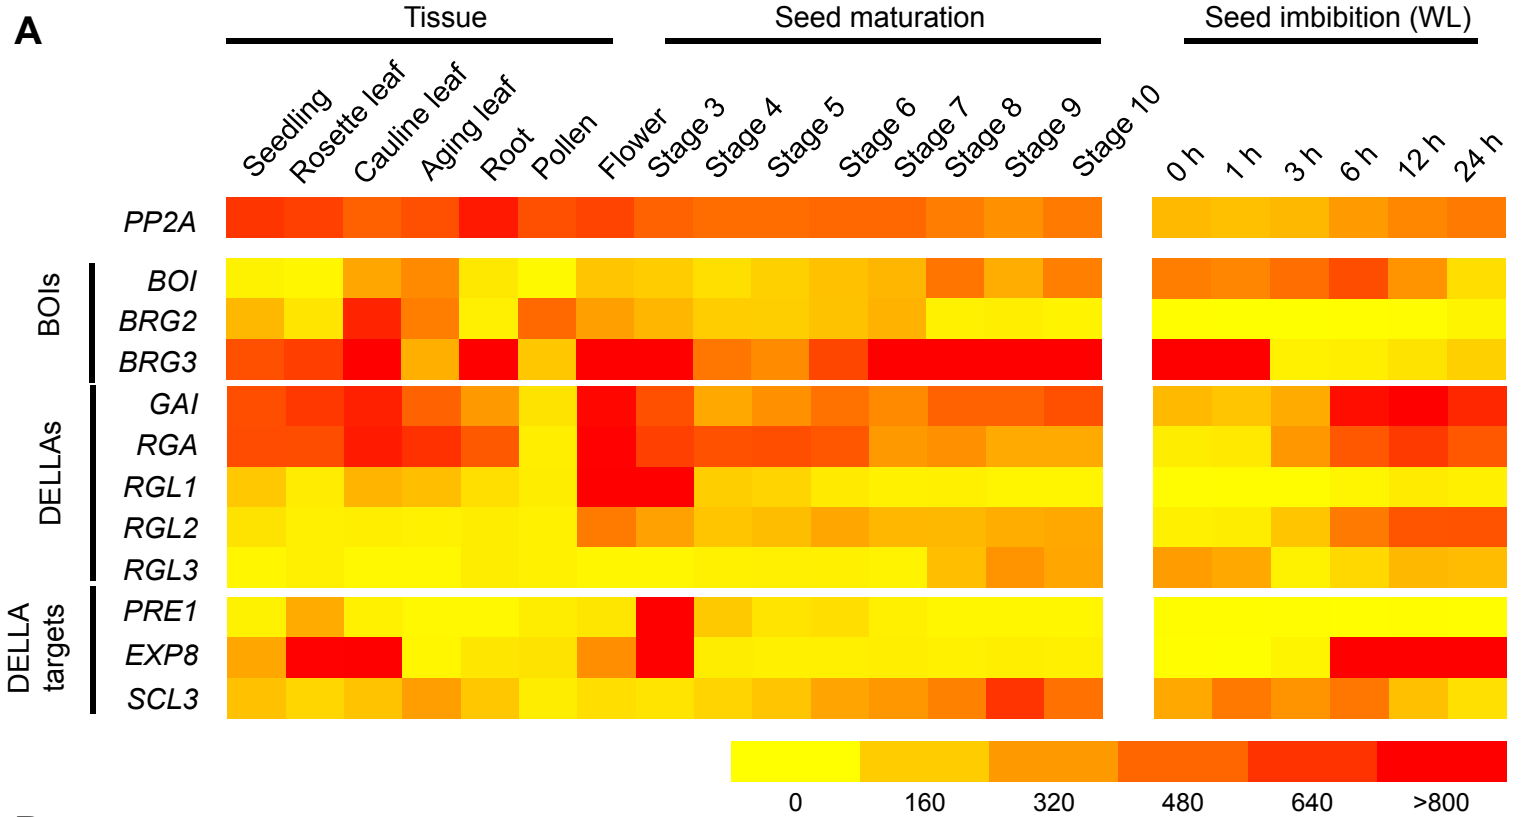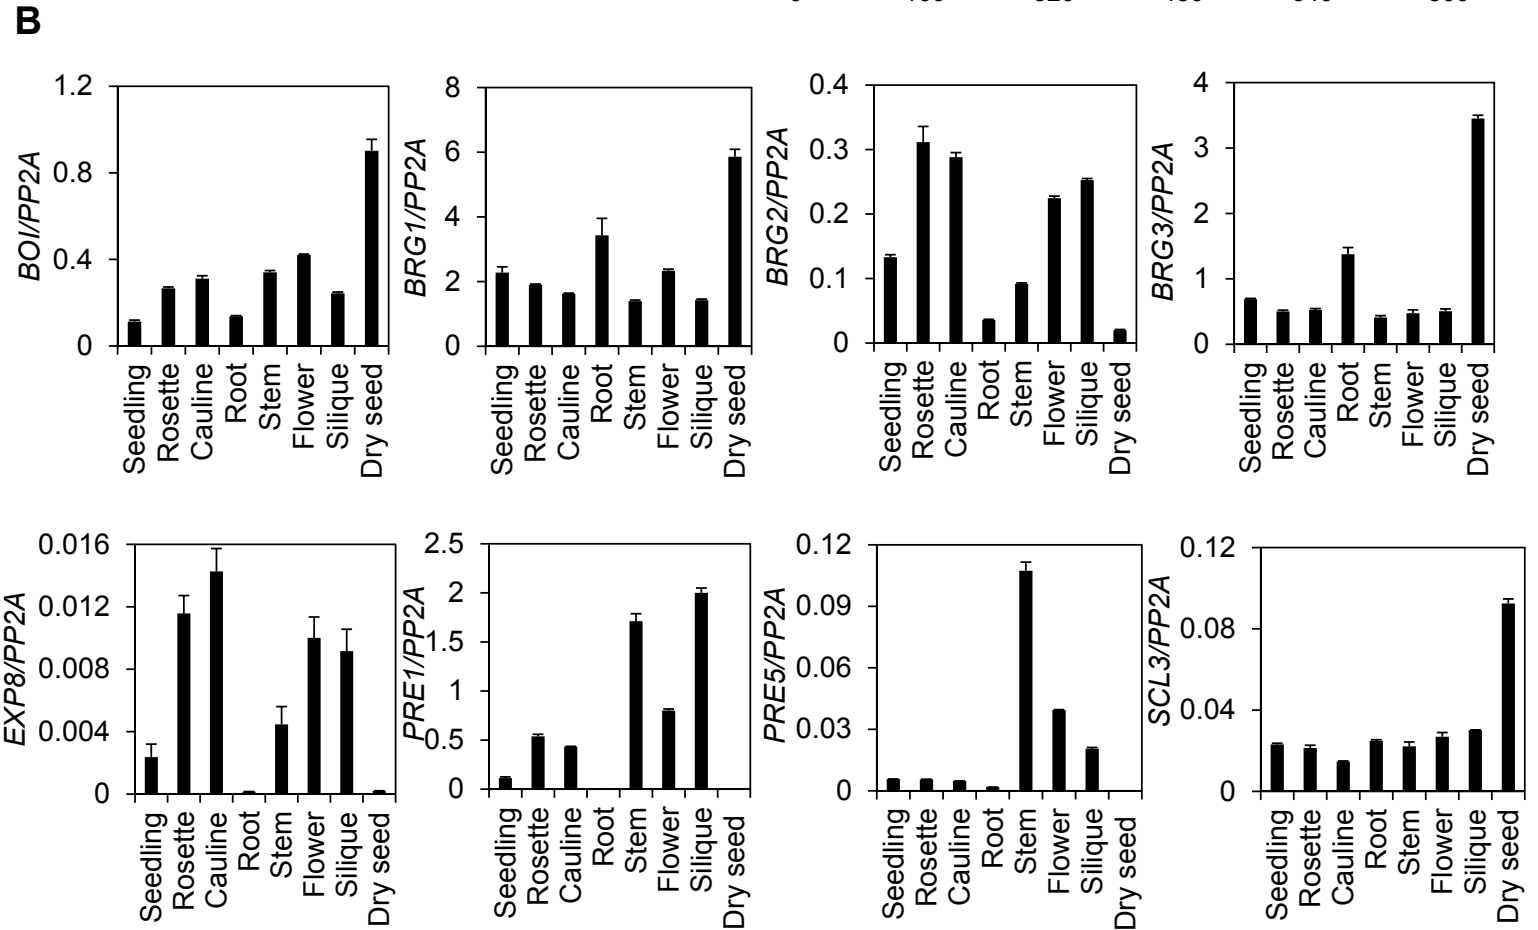

**Supplemental Figure 5.** Expression patterns of BOIs, DELLAs, and their target genes analyzed by the BAR expression browser and visualized by the BAR heatmapper tool (<http://bar.utoronto.ca>) (A) or by quantitative RT-PCR (SD, n=3) (B).

**A**

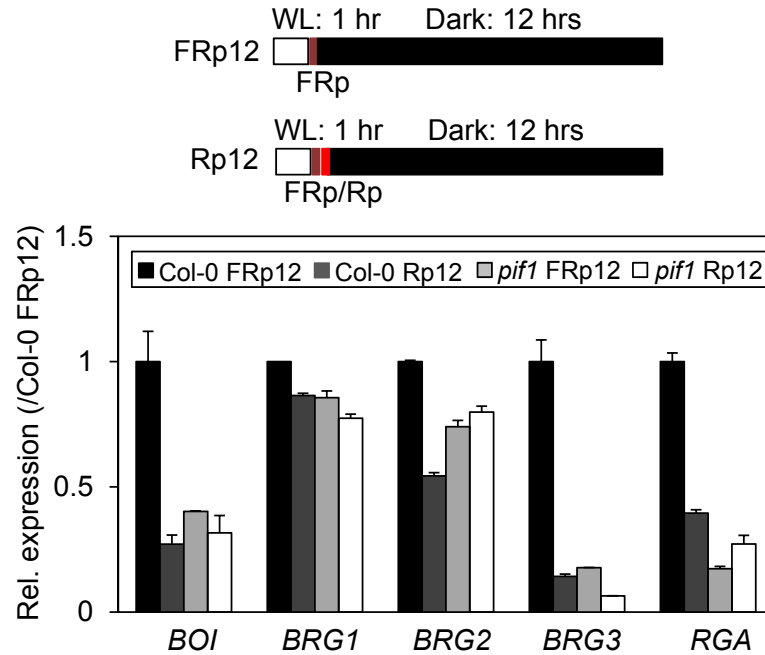

**B**

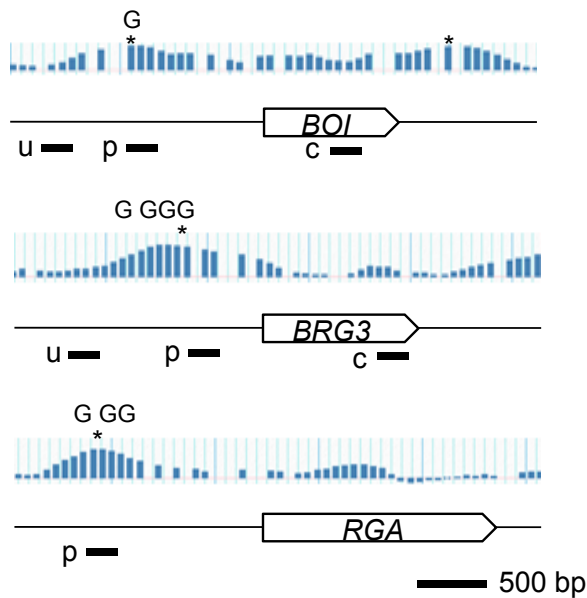

**C**

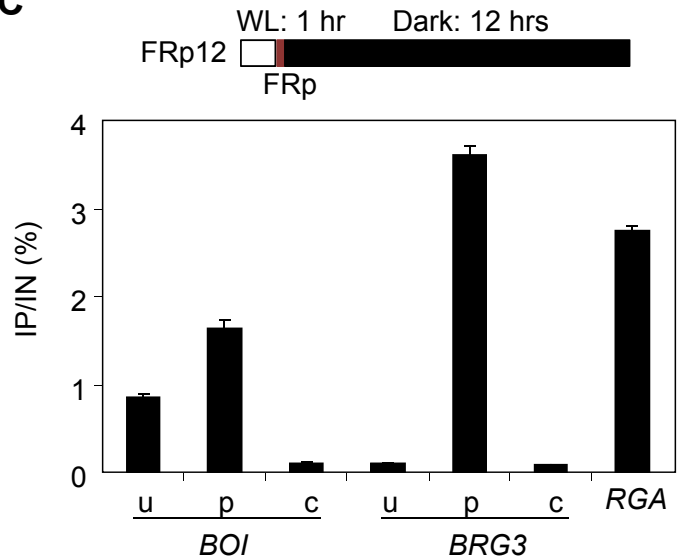

**Supplemental Figure 6.** Direct regulation of *BOI* and *BRG3* expression by PIF1. (A) Repression of *BOI* and *BRG3* mRNA expression by PIF1 during seed germination. Upper diagrams indicate light irradiation scheme for FRp12 and Rp12. Each mRNA level is presented relative to that of Col-0 FRp12 (SD, n=3). (B) Diagrams showing PIF1 ChIP-Chip signals around *BOI*, *BRG3*, and *RGA*. Vertical blue bars indicate PIF1 signal intensities; \* indicates a PIF1 binding site; G indicates G-box elements; and underlines with u, p, and c indicate the amplicons used for ChIP-PCR. (C) Enrichment of *BOI* and *BRG3* promoter fragments by PIF1 ChIP-PCR. The upper diagram indicates light irradiation scheme. The *RGA* promoter was used as a PIF1-binding positive control (SD, n=3).

## Supplemental Table 1. Primers used in this study.

| Name             | Forward primer                                                     | Restriction site                               | Reverse primer                                               | Restriction site | Purposes                                   |
|------------------|--------------------------------------------------------------------|------------------------------------------------|--------------------------------------------------------------|------------------|--------------------------------------------|
| <i>pETM_MCS</i>  | TATGACTAGTTCTAGAGAAATCCCGGGCCTAGGCTC<br>GAGTCGGATCCCGTCGACA        | SpeI-XbaI-EcoRI-XmaI-<br>AvrII-XhoI-BamHI-SalI | TCGATGTCGACGGGATCCGACTCGAGCCTAGGCCCGG<br>GAATCTCTAGAAGACTGCA |                  | Adapter ligation<br>pET29a: NdeI/XhoI      |
| <i>pGADM_MCS</i> | //                                                                 | //                                             | //                                                           |                  | Adapter ligation<br>pGADT7: NdeI/XhoI      |
| <i>pGBKM_MCS</i> | //                                                                 | //                                             | //                                                           |                  | Adapter ligation<br>pGBKT7: NdeI/SalI      |
| <i>pMALM_MCS</i> | AATTGTCTAGAGAATTCGCCGGCCTAGGCTCGAGTC<br>GGATCCCG                   | XbaI-EcoRI-XmaI-AvrII-<br>XhoI-BamHI-SalI      | TCGACGGGATCCGACTCGAGCCTAGGCCCGGGAATTC<br>CTAGAC              |                  | Adapter ligation<br>pMAL-c2X: EcoRI/SalI   |
| <i>phNIL_MCS</i> | CTAGAAGTCTAGTCCCGGGCCTAGGCTCGAGTCGGATCC<br>CGTCGACTAATTGATTAAGAGCT | XbaI-SpeI-XmaI-AvrII-<br>XhoI-BamHI-SalI-SacI  | CTAATCAATTAGTCGACGGGATCCGACTCGAGCCTAGG<br>CCCGGACTAGTT       |                  | Adapter ligation<br>pCAMBIA1300: XbaI/SacI |
| <b>3XFLAG</b>    | GTGT <u>ACTAGT</u> atgGGAGGTGGCAGCGTCGAGATGG                       | SpeI                                           | GGGTCTAGACCCCCCTCGACTTTATCGTCA                               | SmaI             | phNF construction                          |
| <i>BOI</i>       | GTGT <u>CCTAGG</u> atgGCTGTTCAGCTCATCACATG                         | AvrII                                          | GTGTGGATCCGGGAAGACATGTTAACATGCACA                            | BamHI            | Cloning                                    |
| <i>BRG1</i>      | GTGTGT <u>CTAGA</u> atgGCTGTGAAGCAAGACACA                          | XbaI                                           | GTGTGTGTCGACTGATGACATGTTAACATGTACA                           | Sall             | Cloning                                    |
| <i>BRG2</i>      | GTGTGT <u>CTAGA</u> atgGCCGTCGATGCTCACCATC                         | XbaI                                           | GTGTGTGTCGACAGATGACATGTTGACATGAACG                           | Sall             | Cloning                                    |
| <i>BRG3</i>      | GTGT <u>GAAATC</u> atgGCCGTTGAAGCTCACCATCTA                        | EcoRI                                          | GTGTCTCGAGAGAGGAAAGATTAACATGTAGACT                           | XhoI             | Cloning                                    |
| <i>BOIdC</i>     | GTGT <u>CCTAGG</u> atgGCTGTTCAGCTCATCACATG                         | AvrII                                          | GTGTGGATCCAGCGGTTGGAACGTTTCGAGT                              | BamHI            | Cloning                                    |
| <i>RGA</i>       | GAG <u>CTAGA</u> atgAAGAGAGATCATCACAAT                             | XbaI                                           | GAGGGATCCCGTACGCCCGCTCGAG AG                                 | BamHI            | Cloning                                    |
| <i>GAI</i>       | GAG <u>CTAGA</u> atgAAGAGAGATCATCATCTC                             | XbaI                                           | GAGGGATCCCGATTGGTGAGAGTTTCCA                                 | BamHI            | Cloning                                    |
| <i>RGL1</i>      | GAG <u>CTAGA</u> atgAAGAGAGAGACAACCA                               | XbaI                                           | GAGGGATCCCGTCCACACGATTGATTG                                  | BamHI            | Cloning                                    |
| <i>RGL2</i>      | GAG <u>CCTAGG</u> atgAAGAGAGGATACGGAG                              | AvrII                                          | GAGAGATCTCCGGCGAGTTTCCACGCCGA                                | BglII            | Cloning                                    |
| <i>RGL3</i>      | GTGT <u>ACTAGT</u> atgAAACGAAGCCATCAAGAAACG                        | SpeI                                           | GTGTCTCGACCCCGCGCAACTCCGCCGCTAGTTT                           | Sall             | Cloning                                    |
| <i>boi-2</i>     | ATGGCTGTCAAGCTCATCACAT                                             |                                                | AGAAGACATGTTAACATGCAC                                        |                  | Genotyping                                 |
| <i>brg1-1</i>    | TAAATAGCATTATGCACGGG                                               |                                                | CGCCAGATCTGATTCTCTACG                                        |                  | Genotyping                                 |
| <i>brg2-1</i>    | CGTCTGTCTCCACGCTCTAC                                               |                                                | ACGTAAGTTTTGCATCAACGG                                        |                  | Genotyping                                 |
| <i>brg3-3</i>    | AATCCCACCGATCTCTTATG                                               |                                                | TCAAGCTTTGAAAAGTGACG                                         |                  | Genotyping                                 |
| <i>BOI</i>       | TGCTCAACTCGAAACGTTTCC                                              |                                                | ACCAACACTCGTCTCTCTC                                          |                  | RT-qPCR                                    |
| <i>BRG1</i>      | CGTCGTCCTTTGGTTGAAGAAGC                                            |                                                | AGCCGACGATCCACAAACCGTA                                       |                  | RT-qPCR                                    |
| <i>BRG2</i>      | GAACGAAGAGGACGATCGCGA                                              |                                                | TCCTCCCCACAGTTTCTACACA                                       |                  | RT-qPCR                                    |
| <i>BRG3</i>      | GAGGCGCAGGATACGAAAAAGATG                                           |                                                | CTAAGAGGAAAGATTAACATGTAG                                     |                  | RT-qPCR                                    |
| <i>SOC1</i>      | TCGCCAGCTCCAATATGCAAGATAC                                          |                                                | CGATTGAGCATGTTCTATGCGCTTC                                    |                  | RT-qPCR                                    |
| <i>LFY</i>       | TACGCTCTCCACTGCCTAGAC                                              |                                                | AGACGGCGTCTATATCCCAGC                                        |                  | RT-qPCR                                    |
| <i>SPL3</i>      | TGAGAAGAAGCAAAGCGGAA                                               |                                                | TATCCGCGGTACAACCTCTCG                                        |                  | RT-qPCR                                    |
| <i>SPL4</i>      | GTAGCATCAATCGTGGTGGC                                               |                                                | CTTCGCTCATTGTGTCCAGC                                         |                  | RT-qPCR                                    |
| <i>SPL5</i>      | ATGCAGCAGGTTTCATGAGC                                               |                                                | GCCTGACCCTTCTCCAAAAAC                                        |                  | RT-qPCR                                    |
| <i>EXP8</i>      | CATGTATGAAGAAAGGAGGAATAAG                                          |                                                | AACTGCCAATTAGAAGGAGCCACG                                     |                  | RT-qPCR                                    |
| <i>PRE1</i>      | CAGCCTCGAAAGTATTGCAAG                                              |                                                | TTCTAATAACGGCGGCTTCAG                                        |                  | RT-qPCR                                    |
| <i>PRE5</i>      | TCGAATGCTTCGAGGATCTCC                                              |                                                | CAGAGTCAAGAAGCTGCGACA                                        |                  | RT-qPCR                                    |
| <i>SCL3</i>      | CAGCTGAGGCACGTGAGAAATGAT                                           |                                                | ACCACCATGACCTTTGGAGACAAAAC                                   |                  | RT-qPCR                                    |
| <i>PP2A</i>      | TATCGGATGACGATTCTTCGTGACG                                          |                                                | GCTTGGTCGACTATCGGAATGAGAG                                    |                  | RT-qPCR                                    |
| <i>BOlu</i>      | TTGCTACTTGCGAATTACTTGC                                             |                                                | TCTTTGACTCGTATCTCGTC                                         |                  | ChIP-qPCR                                  |
| <i>BOlp</i>      | CACGCTTCTCAGTGCAACTTA                                              |                                                | GCCATGTCATCTCCACCGT                                          |                  | ChIP-qPCR                                  |
| <i>BOlc</i>      | TGCTCAACTCGAAACGTTTCC                                              |                                                | ACCAACACTCGTCTCTCTC                                          |                  | ChIP-qPCR                                  |
| <i>BRG3u</i>     | ATGGAGCTGACTTGATTGGTT G                                            |                                                | ATGACCTATGTGAGACTGTGAC                                       |                  | ChIP-qPCR                                  |
| <i>BRG3p</i>     | GTCCTCAACGGATAAGCAAG                                               |                                                | GGCTCATGTGACAAGACTTGC                                        |                  | ChIP-qPCR                                  |
| <i>BRG3c</i>     | GAGGCGCAGGATACGAAAAAGATG                                           |                                                | CTAAGAGGAAAGATTAACATGTAG                                     |                  | ChIP-qPCR                                  |
| <i>EXP8</i>      | CCCATTCTTCCATTTGTAGATTTC                                           |                                                | GGAGGAATAATACGGATATAATTG                                     |                  | ChIP-qPCR                                  |
| <i>PRE1</i>      | CTCTCTTGTGGTCCATTGGCCTA                                            |                                                | ATCGGCTATGTCTATGTGGCAAG                                      |                  | ChIP-qPCR                                  |
| <i>PRE5</i>      | TCGGATCAACCACAACTTCTAG                                             |                                                | GTGCATGTCACTAAAAGGCAATAC                                     |                  | ChIP-qPCR                                  |
| <i>SCL3</i>      | GCCTCAGCCTCATCTCTTTT                                               |                                                | GGAATCATGACTATATATTCTACATCA                                  |                  | ChIP-qPCR                                  |
| <i>PIL1</i>      | ATGAATCACGCGGCATTC                                                 |                                                | ACGTGAGCGGAAAGAACC                                           |                  | ChIP-qPCR                                  |
| <i>RGA</i>       | GTGACGTAACATGACAATAAACAT                                           |                                                | CTAAAACGGTAGGGACCGAGTCTG                                     |                  | ChIP-qPCR                                  |

\* Underlined are restriction enzyme sites. Start codon (atg) is in lowercase.

**Supplemental Table 2. Vectors used in this study.**

| <b>Name</b> | <b>Transgenic lines and protein name</b> | <b>Plant selection</b> | <b>Usage</b>          |
|-------------|------------------------------------------|------------------------|-----------------------|
| phNF-BOI    | <i>BOI-OX3, BOI-OX4</i> , FLAG-BOI       | Hygromycin             | Transgenic, transient |
| pbFLAG2-BOI | <i>BOI-OX5</i>                           | Phosphinothricin       | Transgenic            |
| pBARH8-BOI  | <i>BOI-OX1, BOI-OX2</i>                  | Phosphinothricin       | Transgenic            |
| phNF-BRG2   | <i>BRG2-OX1</i>                          | Hygromycin             | Transgenic            |
| phNF-BRG3   | <i>BRG3-OX1</i>                          | Hygromycin             | Transgenic            |
| phNF-BOIdC  | <i>BOIdC-OX1, BOIdC-OX2</i>              | Hygromycin             | Transgenic            |
| pbFLAG2-GFP | <i>GFP-OX</i>                            | Phosphinothricin       | Transgenic            |
| phNF-GFP    | FLAG-GFP                                 | Hygromycin             | Transient             |
| pMALM-RGA   | MBP-RGA                                  | n/a                    | Pull-down             |
| pMALM-GAI   | MBP-GAI                                  | n/a                    | Pull-down             |
| pMALM-RGL2  | MBP-RGL2                                 | n/a                    | Pull-down             |
| pETM-BOI    | BOI-His                                  | n/a                    | Antibody production   |
| pGADM-RGA   | AD-RGA                                   | n/a                    | Yeast two-hybrid      |
| pGADM-GAI   | AD-GAI                                   | n/a                    | Yeast two-hybrid      |
| pGADM-RGL1  | AD-RGL1                                  | n/a                    | Yeast two-hybrid      |
| pGADM-RGL2  | AD-RGL2                                  | n/a                    | Yeast two-hybrid      |
| pGADM-RGL3  | AD-RGL3                                  | n/a                    | Yeast two-hybrid      |
| pGBKM-BOI   | BD-BOI                                   | n/a                    | Yeast two-hybrid      |
| pGBKM-BRG1  | BD-BRG1                                  | n/a                    | Yeast two-hybrid      |
| pGBKM-BRG2  | BD-BRG2                                  | n/a                    | Yeast two-hybrid      |
| pGBKM-BRG3  | BD-BRG3                                  | n/a                    | Yeast two-hybrid      |

\* n/a : not applicable.
